# Supplementary material
Source: PubMed Central journal article supplement (PMC7747158)
Supplement: JCB904687_Supplemental_Material2.pdf [file JCB904687_Supplemental_Material2.pdf]

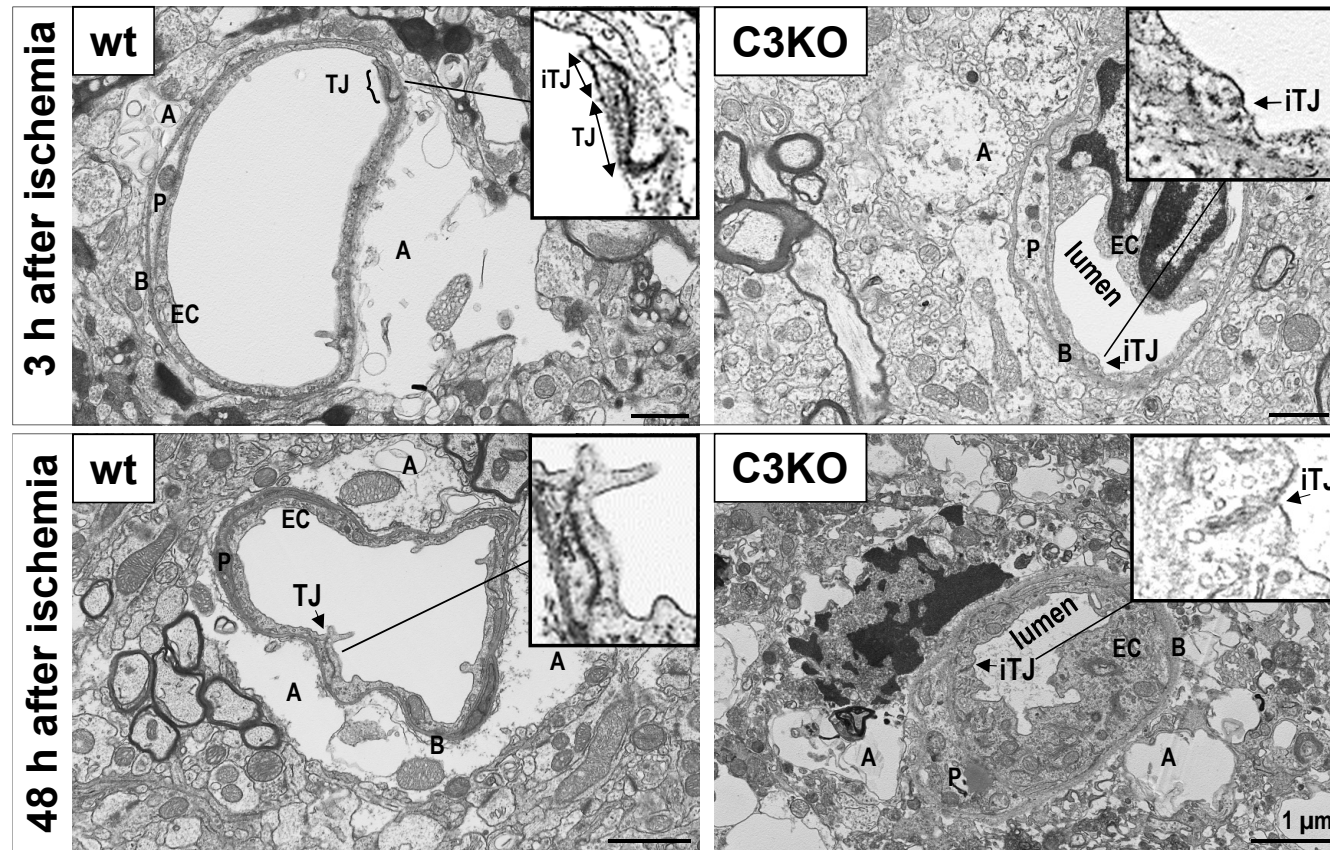

**Supplementary Figure 1:** Reduced swelling of astrocytic endfeet, increase in capillary endothelial cell (EC) swelling or intermittent tight junctions (iTJ) in the neurovascular unit of claudin-3 knockout mice (C3KO) compared to that of wild type (wt) mice after 3 h of reperfusion following 60 min of transient middle cerebral artery occlusion (tMCAO) (upper panel) or after 48 h following 30 min tMCAO (lower panel). Transmission electron microscopy of cross-sectioned capillaries of the striatum; electron dense tight junction (TJ) between ECs; A, astrocytic endfeet; B, basement membrane; P, pericyte.
