# Supplementary material
Source: PubMed Central journal article supplement (PMC7747158)
Supplement: JCB904687_Supplemental_Material3.pdf [file JCB904687_Supplemental_Material3.pdf]

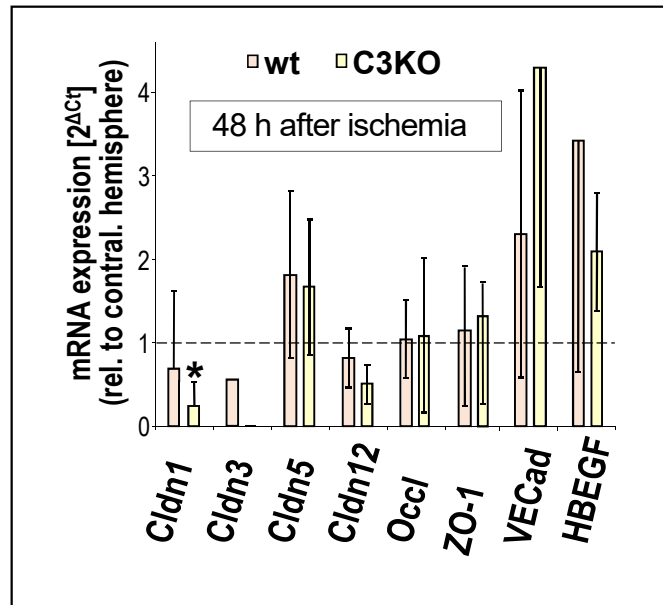

**Supplementary Figure 2:** 48 h after 30 min transient middle cerebral artery occlusion, claudin-1 (Cldn1) mRNA level decreased in the Cldn3 knockout (C3KO) infarct area; mRNA expression of other tight junction proteins in the infarct area did not differ from that of the contralateral area (dashed line). mRNA expression normalized to 28S ribosomal RNA in capillaries isolated by laser capture microdissection from infarction and respective contralateral areas. Mean±SD, n≥4 (Cldn3: n=1); \*, p<0.05 compared to the respective contralateral hemisphere using Mann-Whitney test. VECad, vascular endothelial cadherin; HBEGF, heparin-binding epidermal growth factor-like growth factor; wt, wild type.
