# Supplementary material
Source: PubMed Central journal article supplement (PMC7747158)
Supplement: JCB904687_Supplemental_Material5.pdf [file JCB904687_Supplemental_Material5.pdf]

### Supplementary Table 1: Primers used for qRT-PCR

| Amplicon | Primer sequence (5' → 3') |                       |
|----------|---------------------------|-----------------------|
|          | fw                        | rev                   |
| Actb     | TTTGAGACCTTCAACACCCC      | ATAGCTCTTCTCCAGGGAGG  |
| VECad    | ATTGAGACAGACCCCAAACG      | TTCTGGTTTTTCTGGCAGCTT |
| Cldn1    | GATGTGGATGGCTGTCATTG      | CGTGGTGTGGGTAAGAGGT   |
| Cldn3    | GAGATGGGAGCTGGGTTGTA      | GTAGTCCTTGCGGTCGTAGG  |
| Cldn5    | CTGGACCACAACATCGTGAC      | GCCGGTCCAGGTAACAAAGA  |
| Cldn12   | AACTGGCCAAGTGTCTGGTC      | AGACCCCTGAGCTAGCAAT   |
| Glut1    | GCTGTGCTTATGGGCTTCTC      | AGAGGCCACAAGTCTGCATT  |
| HBEGF    | CCACCTCACTCCCTTTGTGT      | GTCAACTCCAAAGCTCCCTG  |
| Oocl     | ACTCCTCCAATGGCAAAGTG      | CCCCACCTGTCGTGTAGTCT  |
| 28SRNA   | CCCGACGTACGCAGTTTTAT      | CCTTTTCTGGGGTCTGATGA  |
| ZO-1     | CCCACCCCATCTCAGAGTA       | GGGACAGCTTTAGGCATGGT  |
